# Supplementary material for: Evaluation of miRNA as Biomarkers of Emotional Valence in Pigs
Source: MDPI journal article supplement (doi:10.3390/ani11072054), 2021-07-09
Supplement: s1 [file s1]

## Supplementary Materials

Table S1: Indicates the top 10 miRNA genes with highest, albeit non-significant, p-values at bleed 1 in pigs exposed to either enriched or barren housing. Column 1 indicates gene ID; column 2 indicates fold change; column 3 indicates P-value ( $p < 0.05$ ); and column 4 indicates p-values with an adjusted false detection rate (FDR  $p < 0.05$ ).

| Gene ID  | Fold change | <i>p</i> -value | FDR <i>p</i> -value |
|----------|-------------|-----------------|---------------------|
| 20525587 | 6.58        | 0.0023          | 0.9513              |
| 20533249 | -2          | 0.0034          | 0.9513              |
| 20517267 | -3.04       | 0.0042          | 0.9513              |
| 20524386 | -2.2        | 0.0042          | 0.9513              |
| 20525773 | -2.48       | 0.0067          | 0.9513              |
| 20501671 | -2.16       | 0.0082          | 0.9513              |
| 20525565 | 3.79        | 0.0104          | 0.9513              |
| 20514348 | -2.72       | 0.0119          | 0.9513              |
| 20513774 | -2.14       | 0.0143          | 0.9513              |
| 20517052 | -2.17       | 0.0211          | 0.9513              |

Table S2: Indicates the top 10 miRNA genes with highest, albeit non-significant, p-values bleed 2 in pigs exposed to either enriched or barren housing. Column 1 indicates gene ID; column 2 indicates fold change; column 3 indicates p-value ( $p < 0.05$ ); and column 4 indicates p-values with an adjusted false detection rate (FDR  $p < 0.05$ ).

| Gene ID  | Fold change | <i>p</i> -value | FDR <i>p</i> -value |
|----------|-------------|-----------------|---------------------|
| 20517759 | 2.14        | 1.65E-05        | 0.5116              |
| 20519021 | -2.88       | 0.0017          | 0.963               |
| 20525306 | -2.9        | 0.0022          | 0.963               |
| 20504341 | -2.36       | 0.0025          | 0.963               |
| 20508751 | -2.36       | 0.0025          | 0.963               |
| 20509628 | -2.36       | 0.0025          | 0.963               |
| 20516711 | -2.36       | 0.0025          | 0.963               |
| 20524272 | 2.67        | 0.0026          | 0.963               |
| 20514111 | 2.91        | 0.0031          | 0.963               |
| 20511656 | -2.86       | 0.0034          | 0.963               |

Table S3: Indicates the top 10 miRNA genes with highest, albeit non-significant, p-values within the amygdala of pigs exposed to either enriched or barren housing. Column 1 indicates gene ID; column 2 indicates fold change; column 3 indicates p-value ( $p < 0.05$ ); and column 4 indicates p-values with an adjusted false detection rate (FDR  $p < 0.05$ ).

| Gene ID  | Fold change | <i>p</i> -value | FDR <i>p</i> -value |
|----------|-------------|-----------------|---------------------|
| 20535149 | 2.43        | 7.74E-06        | 0.2097              |
| 20519174 | -2.08       | 4.36E-05        | 0.2097              |
| 20511874 | -3.62       | 4.37E-05        | 0.2097              |
| 20526925 | 2.11        | 5.60E-05        | 0.2097              |
| 20529711 | -6.27       | 5.89E-05        | 0.2097              |
| 20519573 | 2.46        | 6.36E-05        | 0.2097              |
| 20518793 | -4.96       | 7.52E-05        | 0.2097              |
| 20523375 | -4.96       | 7.52E-05        | 0.2097              |
| 20504842 | -5.97       | 0.0003          | 0.2711              |
| 20501666 | -2.55       | 0.0004          | 0.277               |
